# Supplementary material for: Combination of ferulic acid, ligustrazine and tetrahydropalmatine inhibits invasion and metastasis through MMP/TIMP signaling in endometriosis
Source: PeerJ journal article supplement (doi:10.7717/peerj.11664), 2021-06-28

**Figure 1**

**E**

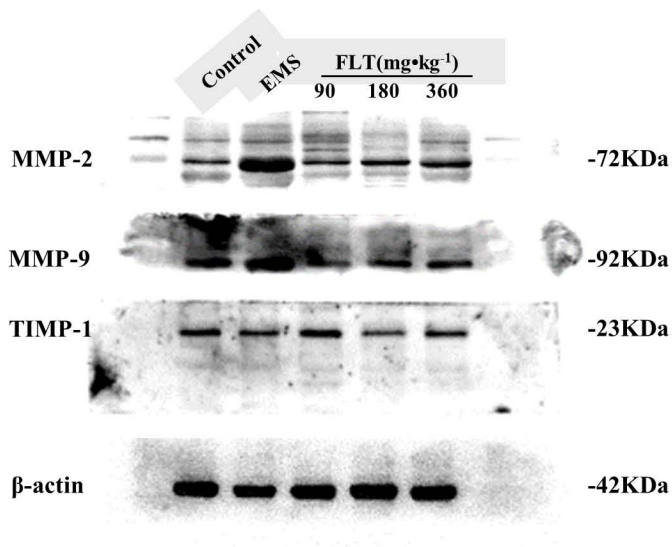

Supplement: BLOTS_fig1.pdf [file BLOTS_fig1.pdf]
